# Supplementary material for: Perturbation of clopyralid on bio-denitrification and nitrite accumulation: Long-term performance and biological mechanism
Source: PubMed Central journal article supplement — Environ Sci Ecotechnol. 2021 Dec 29;9:100144. doi: 10.1016/j.ese.2021.100144 (PMC9488107; doi:10.1016/j.ese.2021.100144), 2021-12-29
Supplement: mmc1.pdf [file mmc1.pdf]

## SUPPORTING INFORMATION

### **Perturbation of clopyralid on bio-denitrification and nitrite accumulation: Long-term performance and biological mechanism**

Suyun Sun<sup>a,b</sup>, Ya-Nan Hou<sup>a,b\*</sup>, Wei Wei<sup>c</sup>, Hafiz Muhammad Adeel Sharif<sup>d</sup>, Cong Huang<sup>b</sup>, Bing-Jie Ni<sup>c</sup>, Haibo Li<sup>a</sup>, Yuanyuan Song<sup>a</sup>, Caicai Lu<sup>a</sup>, Yi Han<sup>a</sup>, Jianbo Guo<sup>a\*</sup>

a Tianjin Key Laboratory of Aquatic Science and Technology, School of Environmental and Municipal Engineering, Tianjin Chengjian University, Tianjin 300384, China

b National Technology Innovation Center of Synthetic Biology, Tianjin Institute of Industrial Biotechnology, Chinese Academy of Sciences, Tianjin 300308, China

c Centre for Technology in Water and Wastewater, School of Civil and Environmental Engineering, University of Technology Sydney, Sydney, NSW 2007, Australia

d College of Chemistry and Environmental Engineering, Shenzhen University, Shenzhen 518060, China

#### **Summary**

Pages: 7 ; Figures: 4; Tables: 2

.

## Methods

### 1. Composition of trace element solution

Trace element solution was prepared dissolving (g/L): 1.50 FeCl<sub>3</sub>·6H<sub>2</sub>O, 0.12 MnCl<sub>2</sub>·4H<sub>2</sub>O, 0.03 CuSO<sub>4</sub>·5H<sub>2</sub>O, 0.15 H<sub>3</sub>BO<sub>3</sub>, 0.18 KI, 0.06 Na<sub>2</sub>MoO<sub>4</sub>·2H<sub>2</sub>O, 0.15 CoCl<sub>2</sub>·6H<sub>2</sub>O, 0.12 ZnSO<sub>4</sub>·7H<sub>2</sub>O, 10 EDTA [1].

### 2. CLP determination

CLP was measured by high-performance liquid chromatography (HPLC, LC-1260, Agilent, USA) with ZORBAX SB-C18 column (250 mm × 4.6 mm × 5 μm) and UV-Vis detector. The detector wavelength was set at 225 nm and 30 μL sample was injected. The mobile phase was a mixture of acetonitrile and water (3:7, v/v) at a flow rate of 1.0 mL/min, and the water was acidified with 0.1% H<sub>3</sub>PO<sub>4</sub>.

### 3. ETSA assay

Election transport system activity (ETSA) was measured according to the described protocol [2]. A mixture of 2 mL samples (washed three times with PBS solution) and 1 mL 0.2 % 2-(4-Iodophenyl)-3-(4-nitrophenyl)-5-phenyltetrazolium chloride (INT) solution was added, and then incubated in a rotary incubator (150 rpm) at 35 °C for 30 min in darkness. The reaction mixture was added 1 mL 37 % methanol to stop enzyme reaction, then the reaction mixture was centrifuged (4000 rpm, 5 min, 25 °C) to discard the supernatant. 5 mL methanol was added to extract the produced triphenyl formazan, and incubated in a rotary incubator at 35 °C for 5 min with continual agitation at 150 rpm/min in darkness. After centrifugation at 4000 rpm for 5 min to collect the supernatants, absorbance of the formed INT-formazan was immediately recorded by ultraviolet spectrophotometer (UV-2700, Shimadzu, Japan) at 485 nm against a methanol solvent blank. The electrons produced by the microbe can react with electron acceptor INT to produce triphenyl formazan. The ETSA value was calculated as follows:

$$INT - ETSA = \frac{D_{485}V}{k_i W t}$$

where  $D_{485}$  is the absorbance value of sample;  $V$  (mL) is extractant volume;  $k_i$  (0.0547) is the slope of the standard curve for triphenyl formazan;  $W$  (mg) is microbial dry

weight and  $t$  (h) is culture time after adding INT.

#### **4. ATP assay**

Adenosine triphosphate (ATP) was measured according to the described protocol [3]. After washed three times with PBS solution and collected by centrifugation (4000 rpm, 10 min, 25 °C), 1 mL samples were resuspended in 6 mL Tris-EDTA buffer solution, and then boiled for 3 min. After cooled to room temperature (25 °C), the solution was centrifuged at 8000 rpm for 5 min and filtered through 0.22  $\mu\text{m}$  filter membranes for analysis. The ATP concentration was determined by high-performance liquid chromatography (HPLC, LC-1260, Agilent, USA), using a ZORBAX SB-C18 column (250 mm  $\times$  4.6 mm  $\times$  5  $\mu\text{m}$ ). The detector wavelength was set at 260 nm and 10  $\mu\text{L}$  sample was injected. The mobile phase was a mixture of 20 mmol/L ammonium acetate (pH 4.5) and acetonitrile (5:95, v/v) at a flow rate of 1.0 mL/min.

#### **5. AHLs assay**

N-acylhomoserine lactones (AHLs) was measured according to the described protocol [4]. 20 mL samples were crushed by an ultrasonic cell crusher, and then centrifuged at 8000 rpm for 5 min. After filtration through 0.22  $\mu\text{m}$  filter membranes, the supernatant was extracted with an equivalent volume of ethyl acetate. The extract was evaporated at 40 °C with a rotary evaporator (Yarong RE-5220, China), and then dissolved in methanol.

The AHLs concentration was detected using the Agilent 6410B UPLC-MS (Agilent, U.S.A.) with BEH C-18 column (50 mm  $\times$  4.6 mm  $\times$  1.8  $\mu\text{m}$ ). The mobile phase was a mixture of methanol and water. The nebulizer gas was  $\text{N}_2$  and the flow rate of dryer gas was set at 9 L/min. The heated capillary and voltage were maintained at 350 °C and 4 kV, respectively.

**Fig. S1.** The acute toxicities of CLP toward the nitrate reduction in denitrification process.

**Fig. S2.** Tafel plot along a CLP gradient.

**Fig. S3.** (a) Effects of CLP concentration on the level of AHLs. Linear relationships between (b) C8-HSL, (c) C4-HSL, (d) C14-HSL and EPS in the recovery stage of denitrification. Error bars represent standard deviations of triplicate measurements.

**Fig. S4.** Average relative abundance of *Acinetobacter* and *Shinella* at different phases.

Fig.S1

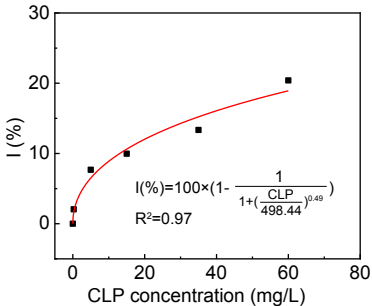

Fig.S2

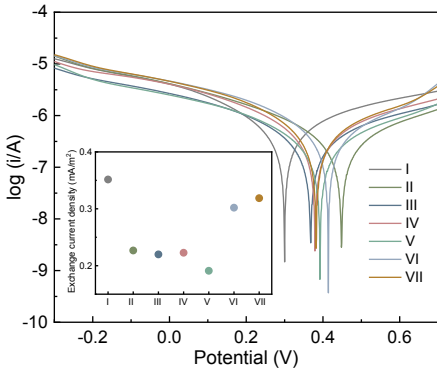

Fig.S3

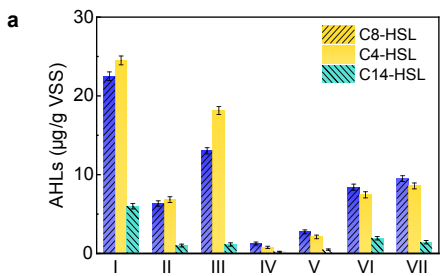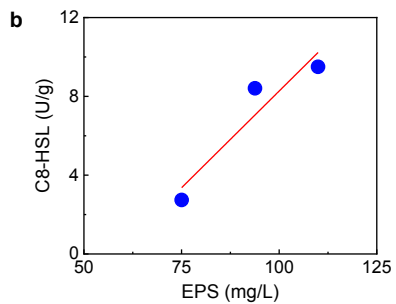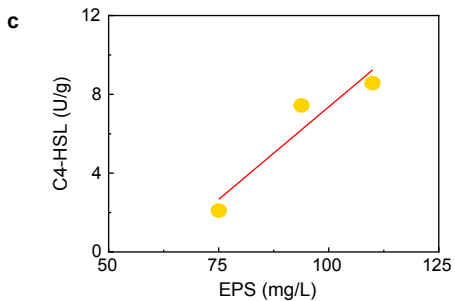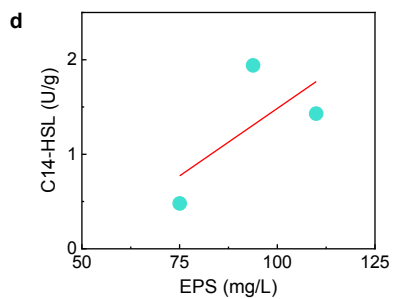

Fig.S4

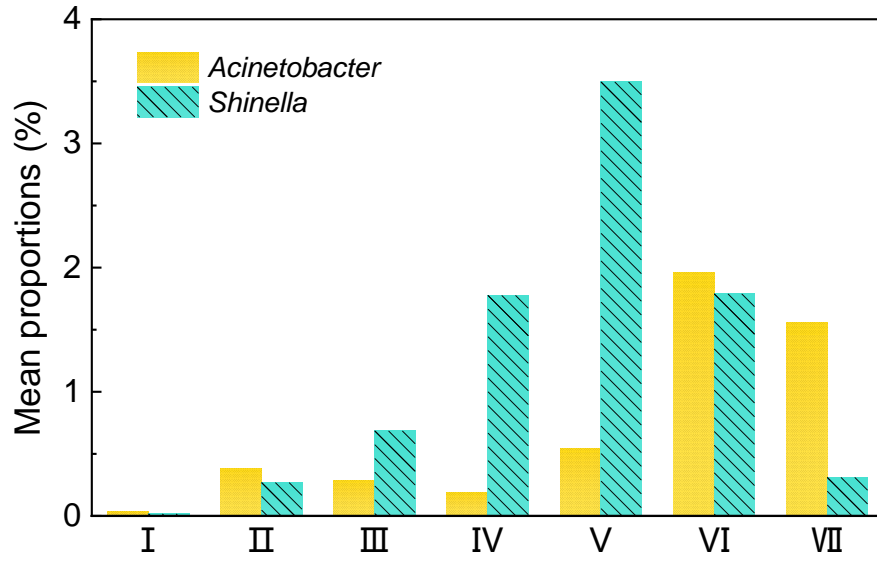



**Table S1**

Similarity-based OTUs and species richness and diversity estimate for denitrifying microbial communities from phase I to phase VII.

| Phase | OTU  | Coverage | Chao    | Ace     | Shannon |
|-------|------|----------|---------|---------|---------|
| I     | 1487 | 0.99     | 1935.87 | 1926.77 | 5.37    |
| II    | 1386 | 0.99     | 1941.81 | 1923.13 | 5.19    |
| III   | 1352 | 0.99     | 1723.32 | 1746.75 | 5.10    |
| IV    | 1322 | 0.99     | 1806.22 | 1874.26 | 5.01    |
| V     | 1284 | 0.99     | 1637.00 | 1676.89 | 4.85    |
| VI    | 1246 | 0.99     | 1697.08 | 1723.51 | 5.12    |
| VII   | 1533 | 0.99     | 1769.15 | 1747.96 | 5.37    |

**Table S2**

Specific values of ROS, SOD, LDH, NAR, NIR, MDH, NADH, ATP, ETSA, EPS and AHLs.

| Phase      | ROS<br>(U/g)       | SOD<br>(U/g)       | LDH<br>(U/g)      | NAR<br>(U/g)  | NIR<br>(U/g)  | MDH<br>(U/g) | NADH<br>(U/g) | ATP<br>(mg/g VSS) | ETSA<br>(µg/(mg·h)) | EPS<br>(mg/g VSS) | C8-HSL<br>(µg/g VSS) | C4-HSL<br>(µg/g VSS) | C14-HSL<br>(µg/g VSS) |
|------------|--------------------|--------------------|-------------------|---------------|---------------|--------------|---------------|-------------------|---------------------|-------------------|----------------------|----------------------|-----------------------|
| <b>I</b>   | 4474.11<br>±136.31 | 4372.71<br>±182.57 | 39.60±2.2<br>0    | 1.46±<br>0.03 | 0.81±<br>0.04 | 2.45±0.12    | 1.89±0.07     | 2.57±0.07         | 2.80±0.06           | 92.28±5.21        | 22.51±0.55           | 24.55±0.56           | 6.12±0.34             |
| <b>II</b>  | 4825.57<br>±207.68 | 5964.26<br>±282.54 | 43.97±2.3<br>9    | 1.56±<br>0.08 | 0.73±<br>0.04 | 2.22±0.14    | 1.70±0.11     | 1.53±0.07         | 2.20±0.03           | 110.05±4.9<br>1   | 6.33±0.35            | 6.83±0.37            | 1.01±0.18             |
| <b>III</b> | 5244.30<br>±209.21 | 5603.27<br>±328.54 | 49.08±3.2<br>0    | 1.47±<br>0.01 | 0.61±<br>0.04 | 2.05±0.12    | 1.53±0.11     | 0.99±0.06         | 2.00±0.02           | 85.90±4.85        | 13.03±0.39           | 18.13±0.51           | 1.13±0.21             |
| <b>IV</b>  | 4863.52<br>±200.16 | 5713.54<br>±515.66 | 46.23±3.3<br>0    | 1.61±<br>0.06 | 0.65±<br>0.03 | 2.19±0.09    | 1.58±0.02     | 1.21±0.10         | 2.10±0.02           | 83.08±3.68        | 1.25±0.19            | 0.76±0.15            | 0.22±0.06             |
| <b>V</b>   | 4752.15<br>±101.65 | 5653.90<br>±370.05 | 46.74±1.0<br>5    | 1.51±<br>0.04 | 0.56±<br>0.03 | 1.76±0.09    | 1.46±0.06     | 0.64±0.02         | 1.80±0.02           | 75.03±3.27        | 2.74±0.25            | 2.10±0.23            | 0.48±0.09             |
| <b>VI</b>  | 4400.67<br>±91.37  | 4674.03<br>±287.34 | 41.74±1.7<br>9    | 1.48±<br>0.02 | 0.59±<br>0.03 | 2.17±0.12    | 1.50±0.06     | 1.34±0.06         | 2.22±0.03           | 93.81±4.82        | 8.41±0.39            | 7.44±0.39            | 1.94±0.23             |
| <b>VII</b> | 4456.54<br>±111.69 | 4525.45<br>±185.38 | 40.71±1.4<br>2192 | 1.66±<br>0.10 | 0.69±<br>0.04 | 2.20±0.11    | 1.74±0.08     | 1.44±0.05         | 2.50±0.05           | 109.97±5.7<br>0   | 9.51±0.37            | 8.57±0.38            | 1.43±0.22             |

## References

- [1] J.T. Ji, Y.Z. Peng, B. Wang, W.K. Mai, X.Y. Li, Q. Zhang, S.Y. Wang, Effects of salinity build-up on the performance and microbial community of partial-denitrification granular sludge with high nitrite accumulation, *Chemosphere* 209 (2018) 53-60.
- [2] Y Xiao, E.H. Zhang, J.D. Zhang, Y.F. Dai, Z.H. Yang, H.E.M. Christensen, J. Ulstrup, F. Zhao, Extracellular polymeric substances are transient media for microbial extracellular electron transfer, *Sci. Adv.* 3(7) (2017) 1700623.
- [3] Y. He, J.B. Guo, Y.Y. Song, Z. Chen, C.C. Lu, Y. Han, H.B. Li, Y.N. Hou, R. Zhao, Acceleration mechanism of bioavailable Fe(III) on Te(IV) bioreduction of *Shewanella oneidensis* MR-1: promotion of electron generation, electron transfer and energy level, *J. Hazard. Mater.* 403 (2021) 123728.
- [4] T. Wang, J.B. Guo, Y.Y. Song, J. Lian, H.B. Li, C.C. Lu, Y. Han, Y.N. Hou, Efficient nitrogen removal in separate coupled-system of anammox and sulfur autotrophic denitrification with a nitrification side-branch under substrate fluctuation, *Sci. Total Environ.* 696 (2019) 133929.
